# Supplementary material
Source: MDPI journal article supplement (https://www.mdpi.com/2311-7524/8/7/604)
Supplement: s1 [file s1]

Table S1

## Tables results of two-way ANOVA

Referring to Figure 1: weight loss

## Lettuce

| Source of Variation                     | % of total variation | P value | P value summary | Significant? |
|-----------------------------------------|----------------------|---------|-----------------|--------------|
| Row Factor (Time)                       | 15.59                | 0.3450  | ns              | No           |
| Column Factor (Treatment)               | 4.691                | 0.3753  | ns              | No           |
| Interaction: Row Factor x Column Factor | 5.379                | 0.3908  | ns              | No           |
| Interaction: Row Factor x Subject       | 36.67                |         |                 |              |
| Interaction: Column Factor x Subject    | 13.04                |         |                 |              |
| Subject                                 | 9.078                |         |                 |              |

## Rocket

| Source of Variation                     | % of total variation | P value | P value summary | Significant? |
|-----------------------------------------|----------------------|---------|-----------------|--------------|
| Row Factor (Time)                       | 86.57                | 0.0015  | **              | Yes          |
| Column Factor (Treatment)               | 0.1283               | 0.6206  | ns              | No           |
| Interaction: Row Factor x Column Factor | 0.9582               | 0.4687  | ns              | No           |
| Interaction: Row Factor x Subject       | 8.457                |         |                 |              |
| Interaction: Column Factor x Subject    | 0.7626               |         |                 |              |
| Subject                                 | 1.135                |         |                 |              |

Referring to Table 2: Lettuce

## FV/Fm

| Source of Variation                     | % of total variation | P value | P value summary | Significant? |
|-----------------------------------------|----------------------|---------|-----------------|--------------|
| Row Factor (Time)                       | 2.334                | 0.7024  | ns              | No           |
| Column Factor (Treatment)               | 0.3610               | 0.4856  | ns              | No           |
| Interaction: Row Factor x Column Factor | 11.06                | 0.1188  | ns              | No           |
| Interaction: Row Factor x Subject       | 34.33                |         |                 |              |
| Interaction: Column Factor x Subject    | 4.664                |         |                 |              |
| Subject                                 | 11.98                |         |                 |              |

## PI

| Source of Variation                     | % of total variation | P value | P value summary | Significant? |
|-----------------------------------------|----------------------|---------|-----------------|--------------|
| Row Factor (Time)                       | 31.26                | 0.0010  | ***             | Yes          |
| Column Factor (Treatment)               | 0.1443               | 0.5768  | ns              | No           |
| Interaction: Row Factor x Column Factor | 5.005                | 0.2172  | ns              | No           |
| Interaction: Row Factor x Subject       | 27.40                |         |                 |              |
| Interaction: Column Factor x Subject    | 2.949                |         |                 |              |
| Subject                                 | 11.47                |         |                 |              |

## Chlorophyll (AU)

| Source of Variation                     | % of total variation | P value | P value summary | Significant? |
|-----------------------------------------|----------------------|---------|-----------------|--------------|
| Row Factor (Time)                       | 5.757                | 0.2884  | ns              | No           |
| Column Factor (Treatment)               | 2.339                | 0.1582  | ns              | No           |
| Interaction: Row Factor x Column Factor | 3.696                | 0.5653  | ns              | No           |
| Interaction: Row Factor x Subject       | 30.09                |         |                 |              |
| Interaction: Column Factor x Subject    | 6.562                |         |                 |              |
| Subject                                 | 14.34                |         |                 |              |

## Total sugars

| Source of Variation                     | % of total variation | P value | P value summary | Significant? |
|-----------------------------------------|----------------------|---------|-----------------|--------------|
| Row Factor (Time)                       | 15.59                | 0.3450  | ns              | No           |
| Column Factor (Treatment)               | 4.691                | 0.3753  | ns              | No           |
| Interaction: Row Factor x Column Factor | 5.379                | 0.3908  | ns              | No           |
| Interaction: Row Factor x Subject       | 36.67                |         |                 |              |
| Interaction: Column Factor x Subject    | 13.04                |         |                 |              |
| Subject                                 | 9.078                |         |                 |              |

## Phenolic Index

| Source of Variation                     | % of total variation | P value | P value summary | Significant? |
|-----------------------------------------|----------------------|---------|-----------------|--------------|
| Row Factor (Time)                       | 13.20                | 0.2957  | ns              | No           |
| Column Factor (Treatment)               | 2.949                | 0.2885  | ns              | No           |
| Interaction: Row Factor x Column Factor | 16.00                | 0.2058  | ns              | No           |
| Interaction: Row Factor x Subject       | 27.58                |         |                 |              |
| Interaction: Column Factor x Subject    | 5.344                |         |                 |              |
| Subject                                 | 9.207                |         |                 |              |

## Anthocyanins

| Source of Variation                     | % of total variation | P value | P value summary | Significant? |
|-----------------------------------------|----------------------|---------|-----------------|--------------|
| Row Factor (Time)                       | 43.18                | 0.0228  | *               | Yes          |
| Column Factor (Treatment)               | 4.252                | 0.0706  | ns              | No           |
| Interaction: Row Factor x Column Factor | 12.41                | 0.1402  | ns              | No           |
| Interaction: Row Factor x Subject       | 16.15                |         |                 |              |
| Interaction: Column Factor x Subject    | 1.684                |         |                 |              |
| Subject                                 | 9.833                |         |                 |              |

## Total Chlorophylls (a+b)

| Source of Variation                     | % of total variation | P value | P value summary | Significant? |
|-----------------------------------------|----------------------|---------|-----------------|--------------|
| Row Factor (Time)                       | 28.94                | 0.0155  | *               | Yes          |
| Column Factor (Treatment)               | 0.01504              | 0.9573  | ns              | No           |
| Interaction: Row Factor x Column Factor | 9.542                | 0.2904  | ns              | No           |
| Interaction: Row Factor x Subject       | 14.39                |         |                 |              |
| Interaction: Column Factor x Subject    | 13.33                |         |                 |              |
| Subject                                 | 14.14                |         |                 |              |

## Total Carotenoids

| Source of Variation                     | % of total variation | P value | P value summary | Significant? |
|-----------------------------------------|----------------------|---------|-----------------|--------------|
| Row Factor (Time)                       | 26.18                | 0.0488  | *               | Yes          |
| Column Factor (Treatment)               | 0.1564               | 0.8176  | ns              | No           |
| Interaction: Row Factor x Column Factor | 9.973                | 0.3124  | ns              | No           |
| Interaction: Row Factor x Subject       | 20.13                |         |                 |              |
| Interaction: Column Factor x Subject    | 7.414                |         |                 |              |
| Subject                                 | 14.34                |         |                 |              |

## Referring to Table 3: Rocket

## FV/Fm

| Source of Variation                     | % of total variation | P value | P value summary | Significant? |
|-----------------------------------------|----------------------|---------|-----------------|--------------|
| Row Factor (Time)                       | 43.99                | 0.0006  | ***             | Yes          |
| Column Factor (Treatment)               | 0.6294               | 0.5173  | ns              | No           |
| Interaction: Row Factor x Column Factor | 1.360                | 0.8105  | ns              | No           |
| Interaction: Row Factor x Subject       | 21.03                |         |                 |              |
| Interaction: Column Factor x Subject    | 6.490                |         |                 |              |
| Subject                                 | 5.279                |         |                 |              |

## PI

| Source of Variation                     | % of total variation | P value | P value summary | Significant? |
|-----------------------------------------|----------------------|---------|-----------------|--------------|
| Row Factor (Time)                       | 31.64                | 0.0030  | **              | Yes          |
| Column Factor (Treatment)               | 1.406                | 0.1152  | ns              | No           |
| Interaction: Row Factor x Column Factor | 7.113                | 0.3913  | ns              | No           |
| Interaction: Row Factor x Subject       | 21.66                |         |                 |              |
| Interaction: Column Factor x Subject    | 1.938                |         |                 |              |
| Subject                                 | 3.011                |         |                 |              |

## Chlorophyll (AU)

| Source of Variation                     | % of total variation | P value | P value summary | Significant? |
|-----------------------------------------|----------------------|---------|-----------------|--------------|
| Row Factor (Time)                       | 7.259                | 0.2940  | ns              | No           |
| Column Factor (Treatment)               | 0.0002210            | 0.9923  | ns              | No           |
| Interaction: Row Factor x Column Factor | 5.305                | 0.6047  | ns              | No           |
| Interaction: Row Factor x Subject       | 26.76                |         |                 |              |
| Interaction: Column Factor x Subject    | 10.72                |         |                 |              |
| Subject                                 | 8.081                |         |                 |              |

Total sugars

| Source of Variation                     | % of total variation | P value | P value summary | Significant? |
|-----------------------------------------|----------------------|---------|-----------------|--------------|
| Row Factor (Time)                       | 16.43                | 0.3014  | ns              | No           |
| Column Factor (Treatment)               | 15.91                | 0.0283  | *               | Yes          |
| Interaction: Row Factor x Column Factor | 21.81                | 0.1914  | ns              | No           |
| Interaction: Row Factor x Subject       | 21.54                |         |                 |              |
| Interaction: Column Factor x Subject    | 0.9413               |         |                 |              |
| Subject                                 | 3.358                |         |                 |              |

Phenolic Index

| Source of Variation                     | % of total variation | P value | P value summary | Significant? |
|-----------------------------------------|----------------------|---------|-----------------|--------------|
| Row Factor (Time)                       | 3.374                | 0.8447  | ns              | No           |
| Column Factor (Treatment)               | 5.482                | 0.5532  | ns              | No           |
| Interaction: Row Factor x Column Factor | 19.94                | 0.1185  | ns              | No           |
| Interaction: Row Factor x Subject       | 24.95                |         |                 |              |
| Interaction: Column Factor x Subject    | 21.98                |         |                 |              |
| Subject                                 | 10.88                |         |                 |              |

Anthocyanins

| Source of Variation                     | % of total variation | P value | P value summary | Significant? |
|-----------------------------------------|----------------------|---------|-----------------|--------------|
| Row Factor (Time)                       | 11.97                | 0.3722  | ns              | No           |
| Column Factor (Treatment)               | 16.20                | 0.1743  | ns              | No           |
| Interaction: Row Factor x Column Factor | 15.04                | 0.0632  | ns              | No           |
| Interaction: Row Factor x Subject       | 19.17                |         |                 |              |
| Interaction: Column Factor x Subject    | 7.561                |         |                 |              |
| Subject                                 | 22.93                |         |                 |              |

Total Chlorophylls (a+b)

| Source of Variation                     | % of total variation | P value | P value summary | Significant? |
|-----------------------------------------|----------------------|---------|-----------------|--------------|
| Row Factor (Time)                       | 29.61                | 0.0838  | ns              | No           |
| Column Factor (Treatment)               | 7.949                | 0.3582  | ns              | No           |
| Interaction: Row Factor x Column Factor | 14.31                | 0.2247  | ns              | No           |
| Interaction: Row Factor x Subject       | 16.30                |         |                 |              |
| Interaction: Column Factor x Subject    | 11.35                |         |                 |              |
| Subject                                 | 5.731                |         |                 |              |

Total Carotenoids

| Source of Variation                     | % of total variation | P value | P value summary | Significant? |
|-----------------------------------------|----------------------|---------|-----------------|--------------|
| Row Factor (Time)                       | 24.43                | 0.1715  | ns              | No           |
| Column Factor (Treatment)               | 12.12                | 0.3051  | ns              | No           |
| Interaction: Row Factor x Column Factor | 18.29                | 0.2570  | ns              | No           |
| Interaction: Row Factor x Subject       | 13.21                |         |                 |              |
| Interaction: Column Factor x Subject    | 12.98                |         |                 |              |
| Subject                                 | 3.704                |         |                 |              |

Referring to Figure 2: Nitrate

Lettuce

| Source of Variation                     | % of total variation | P value | P value summary | Significant? |
|-----------------------------------------|----------------------|---------|-----------------|--------------|
| Row Factor (Time)                       | 29.92                | 0.0014  | **              | Yes          |
| Column Factor (Treatment)               | 35.99                | 0.0810  | ns              | No           |
| Interaction: Row Factor x Column Factor | 1.612                | 0.6618  | ns              | No           |
| Interaction: Row Factor x Subject       | 7.076                |         |                 |              |
| Interaction: Column Factor x Subject    | 16.08                |         |                 |              |
| Subject                                 | 0.5050               |         |                 |              |

Rocket

| Source of Variation                     | % of total variation | P value | P value summary | Significant? |
|-----------------------------------------|----------------------|---------|-----------------|--------------|
| Row Factor (Time)                       | 5.761                | 0.7260  | ns              | No           |
| Column Factor (Treatment)               | 21.39                | 0.0440  | *               | Yes          |
| Interaction: Row Factor x Column Factor | 22.89                | 0.0862  | ns              | No           |
| Interaction: Row Factor x Subject       | 25.55                |         |                 |              |
| Interaction: Column Factor x Subject    | 2.016                |         |                 |              |
| Subject                                 | 9.579                |         |                 |              |

## Referring to Figure 3: Gases concentration

### Lettuce

#### O<sub>2</sub>

| Source of Variation                     | % of total variation | P value | P value summary | Significant? |
|-----------------------------------------|----------------------|---------|-----------------|--------------|
| Row Factor (Time)                       | 66.72                | 0.0018  | **              | Yes          |
| Column Factor (Treatment)               | 1.786                | 0.2901  | ns              | No           |
| Interaction: Row Factor x Column Factor | 2.775                | 0.4058  | ns              | No           |
| Interaction: Row Factor x Subject       | 16.96                |         |                 |              |
| Interaction: Column Factor x Subject    | 3.262                |         |                 |              |
| Subject                                 | 0.7857               |         |                 |              |

#### CO<sub>2</sub>

| Source of Variation                     | % of total variation | P value | P value summary | Significant? |
|-----------------------------------------|----------------------|---------|-----------------|--------------|
| Row Factor (Time)                       | 83.28                | 0.0001  | ***             | Yes          |
| Column Factor (Treatment)               | 0.3347               | 0.3103  | ns              | No           |
| Interaction: Row Factor x Column Factor | 3.448                | 0.2621  | ns              | No           |
| Interaction: Row Factor x Subject       | 2.852                |         |                 |              |
| Interaction: Column Factor x Subject    | 0.6767               |         |                 |              |
| Subject                                 | 3.741                |         |                 |              |

#### RH

| Source of Variation                     | % of total variation | P value | P value summary | Significant? |
|-----------------------------------------|----------------------|---------|-----------------|--------------|
| Row Factor (Time)                       | 18.57                | 0.4464  | ns              | No           |
| Column Factor (Treatment)               | 14.80                | 0.0051  | **              | Yes          |
| Interaction: Row Factor x Column Factor | 5.350                | <0.0001 | ****            | Yes          |
| Interaction: Row Factor x Subject       | 57.13                |         |                 |              |
| Interaction: Column Factor x Subject    | 0.8103               |         |                 |              |
| Subject                                 | 2.799                |         |                 |              |

### Rocket

#### O<sub>2</sub>

| Source of Variation                     | % of total variation | P value | P value summary | Significant? |
|-----------------------------------------|----------------------|---------|-----------------|--------------|
| Row Factor (Time)                       | 45.57                | 0.0024  | **              | Yes          |
| Column Factor (Treatment)               | 10.12                | 0.0130  | *               | Yes          |
| Interaction: Row Factor x Column Factor | 36.43                | 0.0003  | ***             | Yes          |
| Interaction: Row Factor x Subject       | 5.283                |         |                 |              |
| Interaction: Column Factor x Subject    | 0.2684               |         |                 |              |
| Subject                                 | 0.3576               |         |                 |              |

#### CO<sub>2</sub>

| Source of Variation                     | % of total variation | P value | P value summary | Significant? |
|-----------------------------------------|----------------------|---------|-----------------|--------------|
| Row Factor (Time)                       | 46.94                | <0.0001 | ****            | Yes          |
| Column Factor (Treatment)               | 9.933                | 0.0032  | **              | Yes          |
| Interaction: Row Factor x Column Factor | 39.88                | <0.0001 | ****            | Yes          |
| Interaction: Row Factor x Subject       | 1.481                |         |                 |              |
| Interaction: Column Factor x Subject    | 0.06438              |         |                 |              |
| Subject                                 | 0.8572               |         |                 |              |

#### RH

| Source of Variation                     | % of total variation | P value | P value summary | Significant? |
|-----------------------------------------|----------------------|---------|-----------------|--------------|
| Row Factor (Time)                       | 88.81                | 0.0328  | *               | Yes          |
| Column Factor (Treatment)               | 3.418                | 0.0192  | *               | Yes          |
| Interaction: Row Factor x Column Factor | 1.177                | 0.0279  | *               | Yes          |
| Interaction: Row Factor x Subject       | 6.134                |         |                 |              |
| Interaction: Column Factor x Subject    | 0.1351               |         |                 |              |
| Subject                                 | 0.2514               |         |                 |              |
